# Supplementary material for: Spatial Distribution of Macrophage and Lymphocyte Subtypes within Tumor Microenvironment to Predict Recurrence of Non-Muscle-Invasive Papillary Urothelial Carcinoma after BCG Immunotherapy
Source: MDPI journal article supplement (doi:10.3390/ijms25094776), 2024-04-27
Supplement: s1 [file s1]

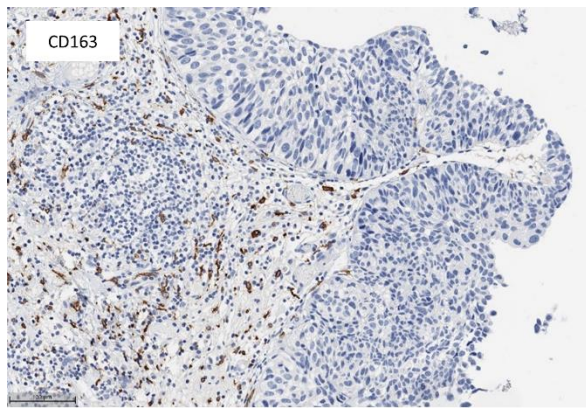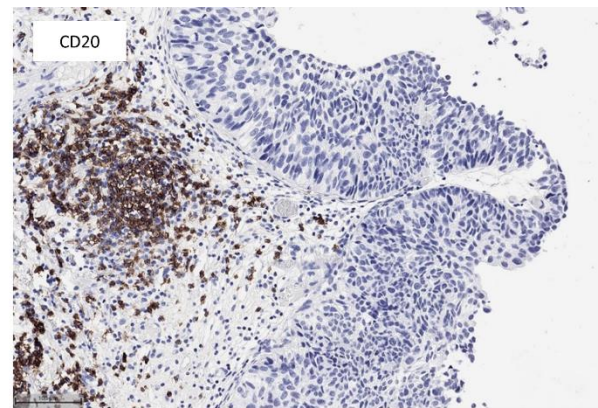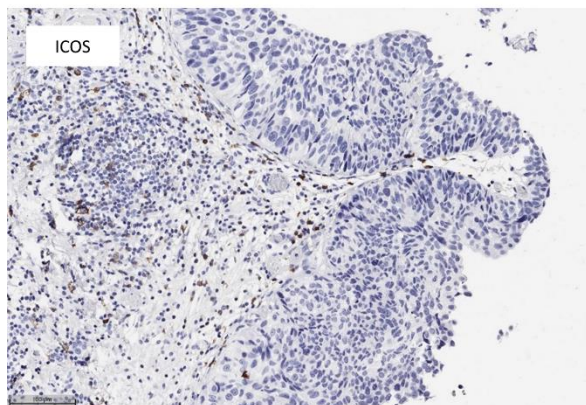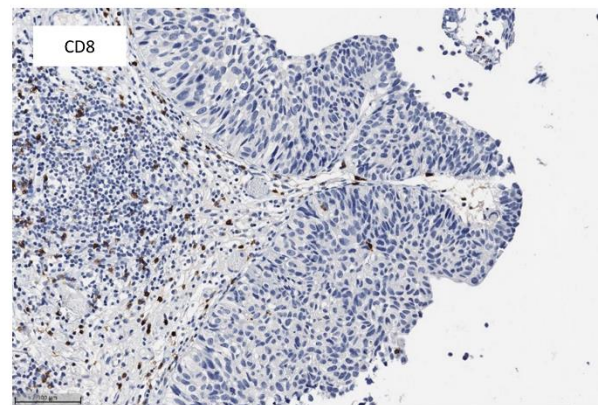

*Supplementary Figure S1. Patient A: immunohistochemical reactions to CD163, CD20, ICOS, and CD8.*

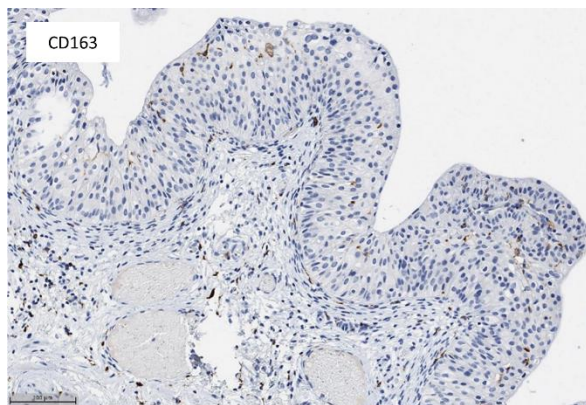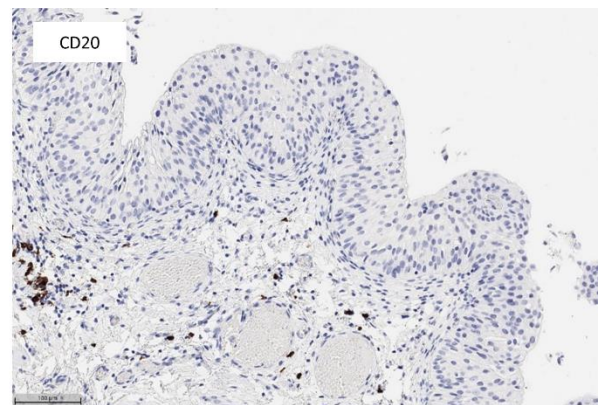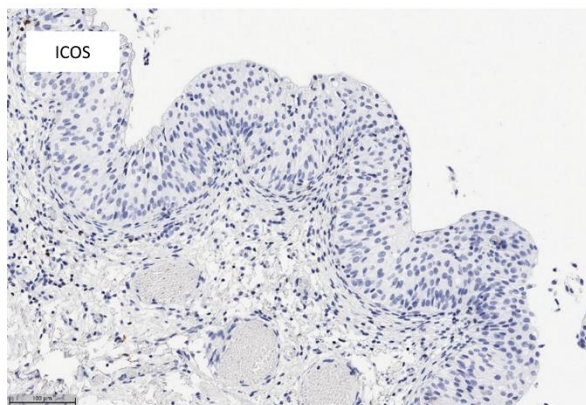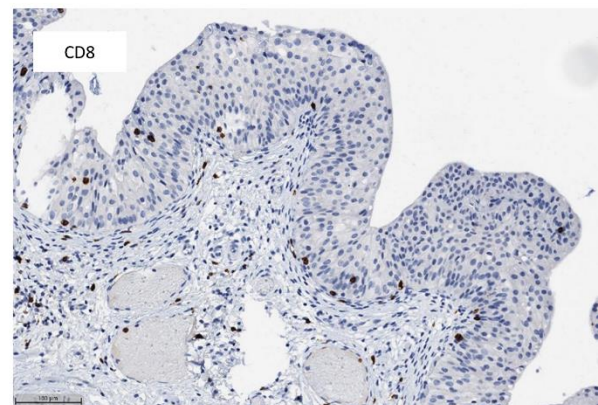

*Supplementary Figure S2. Patient B: immunohistochemical reactions to CD163, CD20, ICOS, and CD8.*
